# Supplementary material for: Influence of the physicochemical characteristics of diatom frustules on hemorrhage control
Source: Royal Society of Chemistry journal article supplement (doi:10.1039/c9bm00099b), 2019-01-01
Supplement: c9bm00099b1.pdf [file c9bm00099b1.pdf]

**Influence of physicochemical characteristic of diatom frustules on hemorrhage control**

Lulu Wang<sup>a</sup>, Kehou Pan<sup>a,c</sup>, Jing Li<sup>b</sup>, Yun Li<sup>a</sup>, Baohua Zhu<sup>a</sup>, Yanan Wang<sup>b</sup>, Chao Feng<sup>\*b</sup>, Jichang Han<sup>\*a,b</sup>

<sup>a</sup>Key Laboratory of Mariculture, Ocean University of China, Ministry of Education, Qingdao 266003, China

<sup>b</sup>College of Marine Life Science, Ocean University of China, Qingdao 266003, China

<sup>c</sup>Function Laboratory for Marine Fisheries Science and Food Production Processes, Qingdao National Laboratory for Marine Science and Technology, Qingdao 266100, China

\*Corresponding author: Chao Feng, Jichang Han

Corresponding author's address: College of Marine Life Science, Ocean University of China, Qingdao 266003, China

Email: [fengchao@ouc.edu.cn](mailto:fengchao@ouc.edu.cn), [hanjichang@ouc.edu.cn](mailto:hanjichang@ouc.edu.cn)

Tel: +86 0532 82032938

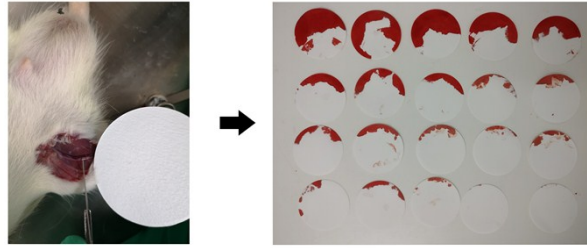

Figure S1. Images of rat femoral artery model and the filter paper of QuikClot<sup>®</sup> group. Hemostasis material was applied once the right femoral artery was cut open by a scalpel. Then, the pre-weighed filter paper (replaced by a new one every 15 s) was put below the vessel incision to absorb blood. The wet filter paper was weighed immediately after being replaced.

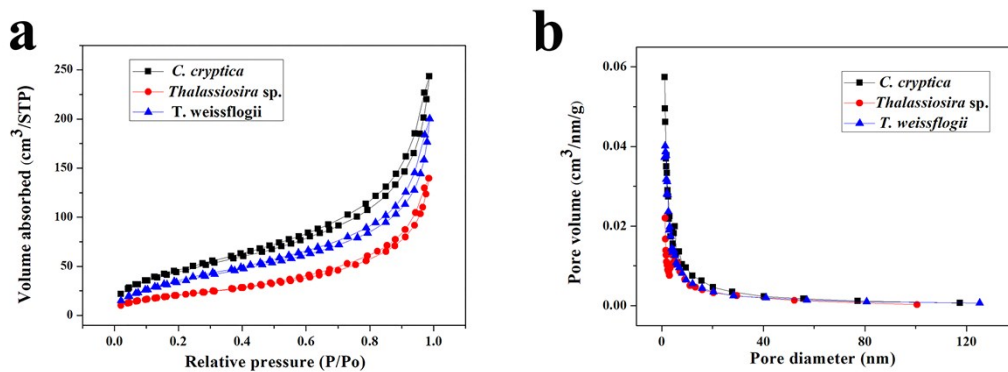

Figure S2. N<sub>2</sub> adsorption-desorption isotherm (a) and pore size distribution of

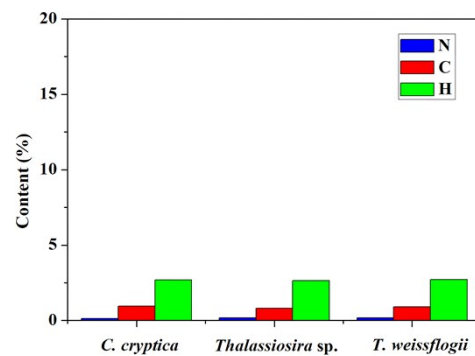

frustules (b).

Figure S3. Element analysis of diatom frustules after being treated by muffle furnace at 500 °C.

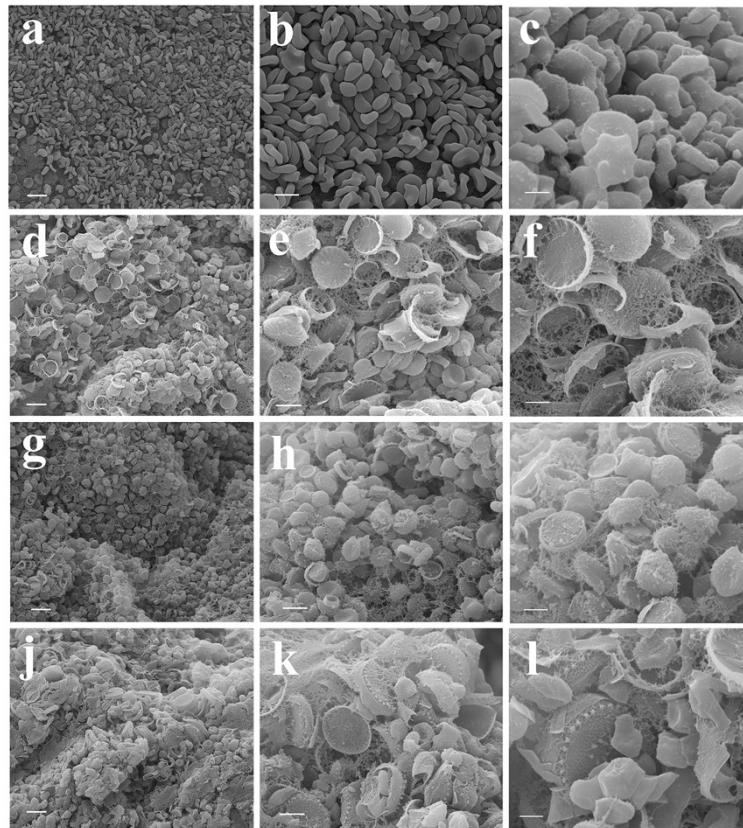

Figure S4. SEM images of bleeding clot. a, b and c indicate the SEM image of blank control; d, e and f indicate the interface between RBCs and *C. cryptica*; g, h and i indicate that of *Thalassiosira* sp.; j, k and l indicate that of *T. weissflogii*. Scale bars in a, b, g and j are 10  $\mu\text{m}$ ; b, e, h and k are 5  $\mu\text{m}$ ; c, f, i and l are 2.5  $\mu\text{m}$ .

Table S1. Physical characteristics of diatom frustules and QuikClot®.

| Diatom species           | Size<br>( $\mu\text{m}$ ) | BET<br>( $\text{m}^2 \text{g}^{-1}$ ) | Average pore<br>diameter (nm) | BJH pore<br>diameter (nm) | Total pore<br>volume ( $\text{cc g}^{-1}$ ) |
|--------------------------|---------------------------|---------------------------------------|-------------------------------|---------------------------|---------------------------------------------|
| <i>C. cryptica</i>       | 8-10                      | 134.6                                 | 8.88                          | 1.151                     | 0.3763                                      |
| <i>Thalassiosira</i> sp. | 3-4                       | 77.7                                  | 1.112                         | 1.144                     | 0.2159                                      |
| <i>T. weissflogii</i>    | 10-12                     | 169.5                                 | 9.18                          | 1.333                     | 0.3094                                      |
| QuikClot®                | 4-7                       | 17.1                                  | 2.573                         | 3.414                     | 0.1082                                      |

Table S2. Hemostasis time, re-bleeding time, and total amount of bleeding of all groups.

|                                  | No treatment          | QuikClot®           | <i>C. cryptica</i>  | <i>Thalassiosira</i> sp. | <i>T. weissflogii</i> |
|----------------------------------|-----------------------|---------------------|---------------------|--------------------------|-----------------------|
| Hemostasis time (s)              | >900                  | 210                 | 310                 | 150                      | 180                   |
| Re-bleeding time (s)             | ND                    | 300                 | 510                 | 600                      | 660                   |
| Total amount of<br>bleeding (mg) | 1568.07 $\pm$ 357.11* | 900.67 $\pm$ 154.67 | 578.13 $\pm$ 126.97 | 457.03 $\pm$ 190.55      | 320 $\pm$ 75.45       |

“\*”, values were determined at 900 s.
